# Supplementary material for: SARS-CoV-2 Vaccines and Adverse Effects in Gynecology and Obstetrics: The First Italian Retrospective Study
Source: MDPI journal article supplement (doi:10.3390/ijerph192013167), 2022-10-13
Supplement: s1 [file s1]

## QUESTIONNAIRE FOR PATIENTS VACCINATED FOR COVID-19

(The information you provide will be used anonymously)

AGE: \_\_\_\_\_  
WEIGHT: \_\_\_\_\_  
HEIGHT: \_\_\_\_\_  
CORTICOSTEROID THERAPIES: \_\_\_\_\_  
OTHER DRUGS: \_\_\_\_\_  
MESTRUAL REGULARITY: \_\_\_\_\_  
PARITY: \_\_\_\_\_  
PREGNANT OR BREASTFEEDING: \_\_\_\_\_  
PREVIOUS ONCOLOGICAL OR GYNECOLOGICAL PATHOOGIES: \_\_\_\_\_  
PREVIOUS BLOOD DISORDERS: \_\_\_\_\_  
OTHER: \_\_\_\_\_

### 1) WHICH VACCINE FOR COVID-19 PERFORMED:

1. Pfizer/BioNTech mRNA vaccine
2. Moderna mRNA vaccine
3. AstraZeneca's recombinant viral vector vaccine

Specify \_\_\_\_\_

### 2) HOW MANY DOSES:

1. 1 dose
2. 2 doses
3. 3 doses

Specify \_\_\_\_\_

### 3) DO YOU REMEMBER HAVING GYNECOLOGICAL DISORDERS AFTER THE VACCINE?

1. Yes
2. No

Specify \_\_\_\_\_

### 4) AFTER WHAT DOSE?

1. 1st dose
2. 2nd dose
3. 3rd dose

Specify \_\_\_\_\_

### 5) HOW LONG AFTER ADMINISTRATION OF THE DOSE?

1. One month
2. More than one month
3. Less than one month

Specify \_\_\_\_\_

### 6) WHAT KIND OF GYNECOLOGICAL DISORDERS DO YOU REMEMBER HAVING HAD?

1. Menstrual delay
2. Blood losses
3. Other \_\_\_\_\_

### 7) HOW LONG DID THEY LAST?

1. One month
2. More than one month
3. Less than one month

Specify \_\_\_\_\_

### 8) AS A RESULT OF THESE DISORDERS, HAVE YOU CARRIED OUT ANY INVESTIGATIONS?

1. Outpatient specialist visit
2. Access to the emergency room
3. Consulted the family doctor/gynecologist for short ways
4. Nothing

Specify \_\_\_\_\_

### 9) HAVE THE DISORDERS BEEN REPORTED TO A HEALTHCARE PROFESSIONAL?

1. YES
2. NO

Specify \_\_\_\_\_

### 10) YOU HAVE DONE:

1. Blood tests
2. Ultrasound
3. Medications
4. Supplements

Specify \_\_\_\_\_

### 11) DO YOU HAVE A REPORT OF THE EXAMS CARRIED OUT?

1. YES
2. NO

Specify \_\_\_\_\_

### 12) AFTER VACCINATION YOU HAD:

1. Pregnancy
2. Miscarriage
3. Birth

Specify \_\_\_\_\_
